# Supplementary material for: Extracellular Loops of the Treponema pallidum FadL Orthologs TP0856 and TP0858 Elicit IgG Antibodies and IgG+-Specific B-Cells in the Rabbit Model of Experimental Syphilis
Source: PubMed Central journal article supplement (PMC9426418; doi:10.1128/mbio.01639-22), 2022-07-12
Supplement: mbio.01639-22-sf002.pdf [file mbio.01639-22-sf002.pdf]

**A**

**TP0856**

Hatch domain 50 100 150

SS146 MVHYKSVFYKSAALVCGFVLAGASVAIASSEAAAKTRSKMSEFKRRAVSSPSGGRLSVLDGSFTALANDASFFEANPAGSANMTHSELTFAHTVGFNNSHAETLSYVQSGNWXGASMRMFFPESGFNFPSTGPVCTPASNPIKLLGG  
 SS167 MVHYKSVFYKSAALVCGFVLAGASVAIASSEAAAKTRSKMSEFKRRAVSSPSGGRLSVLDGSFTALANDASFFEANPAGSANMTHSELTFAHTVGFNNSHAETLSYVQSGNWXGASMRMFFPESGFNFPSTGPVCTPASNPIKLLGG  
 Nichols MVHYKSVFYKSAALVCGFVLAGASVAIASSEAAAKTRSKMSEFKRRAVSSPSGGRLSVLDGSFTALANDASFFEANPAGSANMTHSELTFAHTVGFNNSHAETLSYVQSGNWXGASMRMFFPESGFNFPSTGPVCTPASNPIKLLGG

Signal sequence 200 250 300

SS146 LGIVNFSRRFGGLSIGANLKAGFRDAQGLTHLSLGTDVGLQWVGNVAKFFSSAEPNMYVGLSATNLGFTVKLPGSPFVLCRATGEQCKTCGRCTGVGTCNGEKPCCKDCCDCNCPQDEATPGSPHATDTMLRAGFAYRPLSWFLFSV  
 SS167 LGIVNFSRRFGGLSIGANLKAGFRDAQGLTHLSLGTDVGLQWVGNVAKFFSSAEPNMYVGLSATNLGFTVKLPGSPFVLCRATGEQCKTCGRCTGVGTCNGEKPCCKDCCDCNCPQDEATPGSPHATDTMLRAGFAYRPLSWFLFSV  
 Nichols LGIVNFSRRFGGLSIGANLKAGFRDAQGLTHLSLGTDVGLQWVGNVAKFFSSAEPNMYVGLSATNLGFTVKLPGSPFVLCRATGEQCKTCGRCTGVGTCNGEKPCCKDCCDCNCPQDEATPGSPHATDTMLRAGFAYRPLSWFLFSV

ECL3 ECL4

SS146 GVATRVNNSLQVDHLWKRSSVALGMLDPVRFLLTLLSGVAVNANGKVRAGVGAIEIRVACFQVSASYRYDSTGDEOQGTPHNMSLGAISILLGRK\*  
 SS167 GVATRVNNSLQVDHLWKRSSVALGMLDPVRFLLTLLSGVAVNANGKVRAGVGAIEIRVACFQVSASYRYDSTGDEOQGTPHNMSLGAISILLGRK\*  
 Nichols GVATRVNNSLQVDHLWKRSSVALGMLDPVRFLLTLLSGVAVNANGKVRAGVGAIEIRVACFQVSASYRYDSTGDEOQGTPHNMSLGAISILLGRK\*

ECL5 ECL6 ECL7

**B**

**TP0858**

Hatch domain 50 100 150

SS146 MLRLPTARACITMGTMIRHTFTHRCGALLCALALGSSDMAATAAAKPKKGOMQLRQRPWAPTGGRYASLDGAF TALANDASFFEANPAGSANMTHGELAFFHTTGFGSFHAETLSYVQSGNWXGASMRMFFPESGFDFSTTTEPVC  
 SS167 MLRLPTARACITMGTMIRHTFTHRCGALLCALALGSSDMAATAAAKPKKGOMQLRQRPWAPTGGRYASLDGAF TALANDASFFEANPAGSANMTHGELAFFHTTGFGSFHAETLSYVQSGNWXGASMRMFFPESGFDFSTTTEPVC  
 Nichols MLRLPTARACITMGTMIRHTFTHRCGALLCALALGSSDMAATAAAKPKKGOMQLRQRPWAPTGGRYASLDGAF TALANDASFFEANPAGSANMTHGELAFFHTTGFGSFHAETLSYVQSGNWXGASMRMFFPESGFDFSTTTEPVC

Signal sequence 200 250 300

SS146 TPASNP IKORGAIGIINFARRIGGLSLGANLKAGFRDAQLOHTSVSSDIGLOWGNVAKSFTSEEPNLYIGLAATNLGLTVKVSDEIENCTSTCEKCGCKERCCKGKACCKDCCDCNCPQDCNDKGTVHATDTMLRAGFAYRPFWS  
 SS167 TPASNP IKORGAIGIINFARRIGGLSLGANLKAGFRDAQLOHTSVSSDIGLOWGNVAKSFTSEEPNLYIGLAATNLGLTVKVSDEIENCTSTCEKCGCKERCCKGKACCKDCCDCNCPQDCNDKGTVHATDTMLRAGFAYRPFWS  
 Nichols TPASNP IKORGAIGIINFARRIGGLSLGANLKAGFRDAQLOHTSVSSDIGLOWGNVAKSFTSEEPNLYIGLAATNLGLTVKVSDEIENCTSTCEKCGCKERCCKGKACCKDCCDCNCPQDCNDKGTVHATDTMLRAGFAYRPFWS

ECL2 ECL3 ECL4

SS146 FLFSLGATSMNVQTLASSDAKSLYQNLAYSIGAMDFPFSFLSLSSSFRINHKANMRVGVGAEARIARIKLNAGYRCDVDSISGSGCTGAKASHYLSLGGAILLGRN\*  
 SS167 FLFSLGATSMNVQTLASSDAKSLYQNLAYSIGAMDFPFSFLSLSSSFRINHKANMRVGVGAEARIARIKLNAGYRCDVDSISGSGCTGAKASHYLSLGGAILLGRN\*  
 Nichols FLFSLGATSMNVQTLASSDAKSLYQNLAYSIGAMDFPFSFLSLSSSFRINHKANMRVGVGAEARIARIKLNAGYRCDVDSISGSGCTGAKASHYLSLGGAILLGRN\*

ECL5 ECL6 ECL7

**C**

Signal peptide Hatch

TP0856 1 MVHYKSVFYKSAALVCGFVLAGASVAIASSEAAAKTRSKMSEFKR 46  
 TP0858 1 MLRLPTARACITMGTMIRHTFTHRCGALLCALALG--SSTMAATAAAKPKKGOMQLROR 58

β1 → ECL1 β2

TP0856 47 AVSSPSGGRSLSVLDGSFTALANDASFFEANPAGSANMTHSELTFAHTVGFNNSHAETLSY 106  
 TP0858 59 PVWAPTGGRYASLDGAF TALANDASFFEANPAGSANMTHGELAFFHTTGFGSFHAETLSY 118

β3 → ECL2 β4

TP0856 107 VQSGNWXGASMRMFFPESGFNFPSTGPVCTPASNPIKLLGGLGIVNFSRRFGGLSIG 166  
 TP0858 119 VQSGNWXGASMRMFFPESGFDFSTTEPVCPTASNP IKORGAIGIINFARRIGGLSLG 178

β5 → ECL3 β6 → β7

TP0856 167 ANLKAGFRDAQGLTHLSLGTDVGLQWVGNVAKFFSSAEPNMYVGLSATNLGFTVKLPGSP 226  
 TP0858 179 ANLKAGFRDAQLOHTSVSSDIGLOWGNVAKSFTSEEPNLYIGLAATNLGLTVKVS-DK 237

ECL4 β8

TP0856 227 FVLCRATGEQCKTCGRCTGVGTCNGEKPCCKDCCDCNCPQDEATPGSPHATDTMLRA 286  
 TP0858 238 IENCTSTCEKCG-CCKERC-----CCNGKACCKDCCDCNCPQDCNDKGTVHATDTMLRA 291

β9 → ECL5 β10 → β11

TP0856 287 GFAYRPLSWFLFSVGVATRVNNSLQ---VDHLWKRSSVALGMLDPVRFLLTLLSGVAVN 343  
 TP0858 292 GFAYRPLSWFLSLGATSMNVQTLASSDAKSLYQNLAYSIGAMDFPFSFLSLSSSFRIN 351

ECL6 β12 → β13 → ECL7 β14

TP0856 344 ANGKVRAGVGAIEIRVACFQVSASYRYDS-----TGDEOQGTPHNMSLGAISILLGRK\* 395  
 TP0858 352 HKANMRVGVGAEARIARIKLNAGYRCDVDSISGSGCTGAKASHYLSLGGAILLGRN\* 409
